# Supplementary material for: Short-Term Benefits from Manual Therapy as an Adjunct Treatment for Persistent Postural-Perceptual Dizziness Symptoms: A Preliminary Prospective Case Series
Source: MDPI journal article supplement (doi:10.3390/jfmk9020082), 2024-05-03
Supplement: s1 [file s1]

Table S1: Raw Scores: Before (Pre) and After (Post) Intervention Outcome Measures

| Patient | Age | #<br>Visits | DHI |      | TUG |      | Tandem<br>(Pre) |       | Tandem<br>(Post) |       | SLS (Pre) |       | SLS (Post) |       |
|---------|-----|-------------|-----|------|-----|------|-----------------|-------|------------------|-------|-----------|-------|------------|-------|
|         |     |             | Pre | Post | Pre | Post | Left            | Right | Left             | Right | Left      | Right | Left       | Right |
| 1       | 72  | 4           | 58  | 20   | 12  | 10   | 15              | 12    | 15               | 12    | 6         | 8     | 11         | 13    |
| 2       | 83  | 8           | 44  | 16   | 13  | 10   | 5               | 3     | 12               | 12    | 0         | 0     | 4          | 7     |
| 3       | 76  | 7           | 44  | 12   | 16  | 11   | 6               | 7     | 15               | 13    | 7         | 5     | 10         | 12    |
| 4       | 86  | 3           | 36  | 12   | 13  | 13   | 2               | 4     | 5                | 7     | 0         | 0     | 4          | 4     |
| 5       | 71  | 5           | 60  | 8    | 10  | 9    | 10              | 10    | 10               | 14    | 8         | 6     | 12         | 11    |
| 6       | 79  | 3           | 42  | 10   | 16  | 11   | 3               | 0     | 6                | 3     | 0         | 0     | 0          | 0     |
| 7       | 17  | 5           | 44  | 0    | 9   | 3    | 25              | 30    | 30               | 30    | 25        | 27    | 30         | 30    |
| 8       | 49  | 7           | 88  | 12   | 12  | 4    | 12              | 8     | 30               | 30    | 3         | 3     | 30         | 30    |
| 9       | 78  | 3           | 60  | 12   | 10  | 8    | 0               | 5     | 22               | 14    | 3         | 5     | 16         | 17    |
| 10      | 56  | 3           | 56  | 12   | 8   | 6    | 7               | 0     | 17               | 14    | 16        | 17    | 19         | 16    |
| 11      | 79  | 4           | 56  | 8    | 9   | 9    | 3               | 3     | 15               | 15    | 5         | 10    | 10         | 12    |
| 12      | 73  | 2           | 58  | 0    | 12  | 8    | 10              | 14    | 25               | 22    | 10        | 8     | 18         | 16    |

Note: Total Dizziness Handicap Index (DHI) scores; Timed Up and Go (TUG) in seconds; Age (years); # = Number; Post = post-test; SLB = Single Leg-Stance in seconds; Tandem in seconds
